# Supplementary material
Source: PubMed Central journal article supplement (PMC3143552)
Supplement: supp_blood-2010-12-328302_Document1.pdf [file supp_blood-2010-12-328302_Document1.pdf]

**Table S1. Definitions used in ACAs classification**

|                                  |                                                                                                                                                                                                                                                                                                                                                       |
|----------------------------------|-------------------------------------------------------------------------------------------------------------------------------------------------------------------------------------------------------------------------------------------------------------------------------------------------------------------------------------------------------|
| Aberration                       | <ul style="list-style-type: none"><li>• Count 1 for each aberration separated from the rest of the karyotype by a comma, regardless of the complexity</li><li>• Count each aberration only once (in multiple clones)</li><li>• Constitutional abnormality: count 0, if uncertain count 1</li><li>• Clonal tetraploidy or triploidy: count 1</li></ul> |
| ACAs cases                       | all cases harboring 2 or more aberrations                                                                                                                                                                                                                                                                                                             |
| Complex karyotype                | all cases harboring 3 or more aberrations                                                                                                                                                                                                                                                                                                             |
| Numerical ACAs                   | loss or gain of a complete chromosome. Cases also harboring a marker chromosome were excluded for numerical losses                                                                                                                                                                                                                                    |
| Structural ACAs                  | all aberrations that include breakpoints within the chromosomes                                                                                                                                                                                                                                                                                       |
| Partial chromosomal loss or gain | all unbalanced structural aberrations that result in loss or gain of chromosomal material, not being a complete chromosome                                                                                                                                                                                                                            |
| Balanced translocation           | exchange of material from one chromosome to another and vice versa without loss of material (as observed by conventional karyotyping)                                                                                                                                                                                                                 |
| Balanced karyotype               | karyotype of a patient which contains two complete copies of all autosomes and complete copies of sex chromosomes, without additional material (2n)                                                                                                                                                                                                   |

**Abbreviations:** ACAs indicates additional cytogenetic aberrations

**Table S2. Multivariate survival analysis of the t(9;11)(p22;q23) subgroup by using the Cox proportional hazards model**

|                | Cox proportional hazards model |             |        |      |             |        |                   |             |        |
|----------------|--------------------------------|-------------|--------|------|-------------|--------|-------------------|-------------|--------|
|                | EFS                            |             |        | OS   |             |        | Relapse incidence |             |        |
|                | HR                             | CI          | P      | HR   | CI          | P      | HR                | CI          | P      |
| <b>Trisomy</b> |                                |             |        |      |             |        |                   |             |        |
| no trisomy     | 1                              | reference   |        | 1    | reference   |        | 1                 | reference   |        |
| 8              | 0.68                           | (0.37-1.25) | 0.214  | 0.75 | (0.37-1.51) | 0.425  | 0.56              | (0.32-0.99) | 0.046* |
| 19             | 2.12                           | (1.08-4.18) | 0.029* | 3.02 | (1.44-6.34) | 0.003† | 2.24              | (1.08-4.64) | 0.029* |
| 21             | 0.91                           | (0.44-1.89) | 0.794  | 0.90 | (0.40-1.99) | 0.785  | 0.68              | (0.32-1.44) | 0.314  |
| <b>Type</b>    |                                |             |        |      |             |        |                   |             |        |
| no ACAs        | 1                              | reference   |        | 1    | reference   |        | 1                 | reference   |        |
| numerical      | 1.32                           | (0.78-2.23) | 0.292  | 1.38 | (0.74-2.57) | 0.310  | 1.67              | (1.01-2.76) | 0.045* |
| structural     | 1.39                           | (0.94-2.06) | 0.102  | 1.41 | (0.88-2.26) | 0.148  | 1.08              | (0.77-1.51) | 0.650  |
| <b>FAB</b>     |                                |             |        |      |             |        |                   |             |        |
| non M5         | 1                              | reference   |        | 1    | reference   |        | 1                 | reference   |        |
| M5             | 0.47                           | (0.33-0.69) | 0.000† | 0.48 | (0.31-0.75) | 0.001† | 0.75              | (0.53-1.06) | 0.106  |
| <b>Age</b>     |                                |             |        |      |             |        |                   |             |        |
| 2-9 yr         | 1                              | reference   |        | 1    | reference   |        | 1                 | reference   |        |
| <2 yr          | 1.68                           | (1.13-2.50) | 0.011* | 1.92 | (1.18-3.12) | 0.008† | 1.21              | (0.89-1.64) | 0.220  |
| ≥10 yr         | 1.45                           | (0.92-2.29) | 0.110  | 1.61 | (0.93-2.81) | 0.090  | 1.22              | (0.86-1.73) | 0.272  |

**Note:** Results of 3 independent analyses.

**Abbreviations:** EFS indicates event-free survival; OS, overall survival HR, hazard ratio; CI, 95% confidence interval.

\* Values significant at  $P < 0.05$  level.

† Values significant at  $P < 0.01$  level.

**Figure S1. Histogram showing number of additional aberrations found in 733 cases**

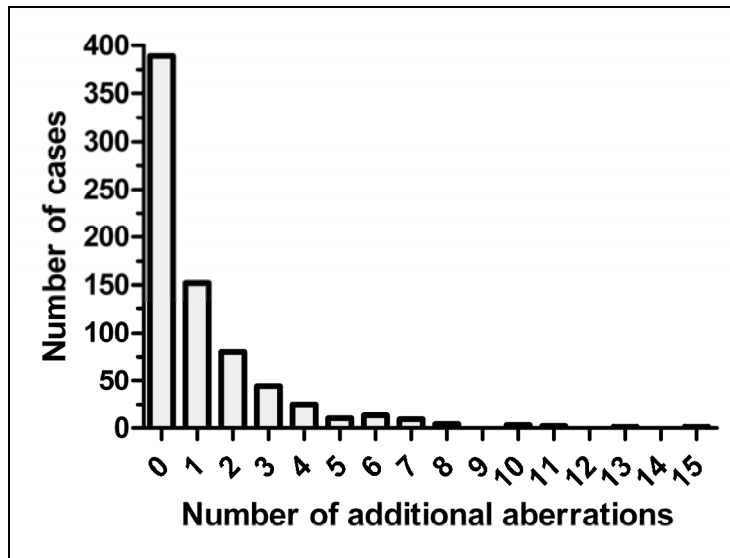

**Note:** Number of additional aberrations are on the X-axis, number of cases are on the Y-axis. All aberrations additional to a balanced 11q23/*MLL*-rearrangement are included in the total number of additional aberrations.

**Figure S2. Frequency (number of cases) of numerical ACAs (A) and structural ACAs (B) in the t(9;11)(p22;q23) subgroup**

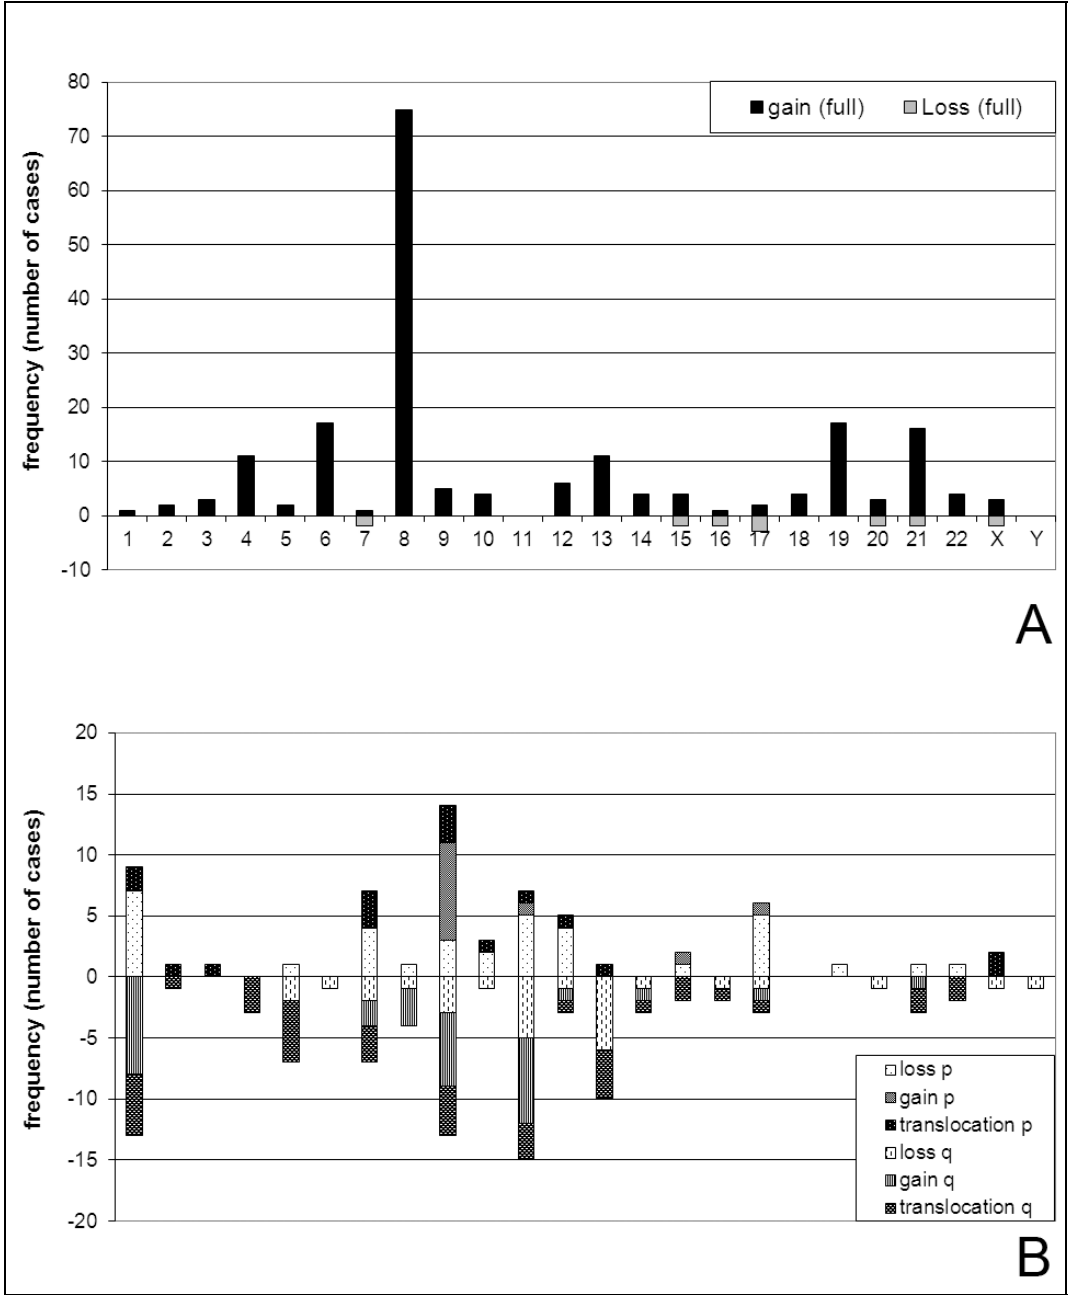

**Note:** In figure 3A gains are shown on the positive Y-axis, losses are shown on the negative Y-axis. Chromosomes are on the X-axis; figure 3B, the short arms (p) of the chromosomes are shown on the positive Y-axis, the long arms (q) on the negative Y-axis. Lightest shades are used for losses, medium shaded colors are used for gains, darkest shaded colors for translocation breakpoints. Chromosomes are on the X-axis. Balanced 11q23 translocations are not included in the figure.
